# Supplementary material
Source: PubMed Central journal article supplement (PMC7613118)
Supplement: EMS150703-supplement-Supplemental_File_2.pdf [file EMS150703-supplement-Supplemental_File_2.pdf]

## Supplemental Materials:

### The BET inhibitor CPI203 promotes ex-vivo expansion of cord blood long-term repopulating HSCs and megakaryocytes

Peng Hua<sup>1,2\*</sup>, Joanna Hester<sup>3\*</sup>, George Adigbli<sup>3\*</sup>, Rong Li<sup>1</sup>, Bethan Psaila<sup>1</sup>, Anindita Roy<sup>4</sup>, Carole J.R. Bataille<sup>5</sup>, Graham M. Wynne<sup>5</sup>, Thomas Jackson<sup>4</sup>, Thomas A. Milne<sup>1</sup>, Angela J. Russell<sup>5,6</sup>, James Davies<sup>1,2</sup>, Irene Roberts<sup>1,4</sup>, Fadi Issa<sup>3#</sup>, Suzanne M. Watt<sup>2,7#</sup>

1. MRC Molecular Haematology Unit, Weatherall Institute of Molecular Medicine, Radcliffe Department of Medicine, John Radcliffe Hospital, Oxford, OX3 9DS, UK.
2. Nuffield Division of Clinical Laboratory Medicine, Radcliffe Department of Medicine, University of Oxford, John Radcliffe Hospital, Oxford, OX3 9BQ, UK.
3. Transplantation Research Immunology Group, Nuffield Department of Surgical Sciences, University of Oxford, John Radcliffe Hospital, Oxford, OX3 9DU, UK.
4. Department of Paediatrics, University of Oxford, Children's Hospital, John Radcliffe Hospital, Oxford OX3 9DU, UK.
5. Department of Chemistry, University of Oxford, Chemistry Research Laboratory, Mansfield Road, Oxford OX1 3TA, UK.
6. Department of Pharmacology, University of Oxford, Mansfield Road, Oxford OX1 3QT, UK.
7. Adelaide Medical School, Faculty of Health and Medical Sciences, University of Adelaide, Adelaide 5005, and South Australian Health and Medical Research Institute, Adelaide 5001, Australia.

\* These authors contributed equally. # These senior authors contributed equally.

**Running Title:** CPI203 expanded UCB LT-HSCs and megakaryocytes

## Supplemental Methods

### Cell isolation

Human umbilical cord blood (UCB) was collected from the John Radcliffe Hospital, Oxford, UK or provided via the NHS Cord Blood Bank, London, and used with informed, written pre-consent and ethical approval (REC Ref. no. 15/SC/0027) from the South Central Oxford C and Berkshire Ethical Committees and approval of the NHSBT R&D committee.

Mononuclear cells (MNCs; density <1.077g/ml) were isolated by density gradient centrifugation no more than 24 hours after UCB collection. Human CD133+ hematopoietic stem and progenitor cells (HSPC) were enriched by MACS using the CD133 direct microbead kits (Miltenyi Biotec GmbH) and cryopreserved until use<sup>s1,s2</sup>. Purity of the cell

isolation was assessed by flow cytometry and only donor samples with >90% UCB CD133+ cell purity were used for expansion experiments.

### **Expansion culture**

Cells were thawed and cultured overnight (20-24hs) in 24-well flat bottom plates at 50,000 cells/ml in serum-free Stem Span ACF media (Stem Cell Technologies) supplemented cytokines (SCF, FLT-3L (both at 100ng/ml) and TPO (20ng/ml) all from R&D Systems) at 37°C, 5% CO<sub>2</sub>, 95% humidity. On day 0, cells were harvested, counted using Countbright absolute counting beads (Molecular Probes) by flow cytometry and plated onto Corning 6 or 24 well plates at an optimised cell density of 5000 cells/ml in Stem Span ACF supplemented with 3 cytokines as described<sup>s3</sup>. Cells were either treated with the small-molecules<sup>s4,s5,s6</sup> at various concentrations in DMSO or an equivalent amount of vehicle (0.1% DMSO, Sigma) then harvested for downstream assays on days 2-5. For *in vivo* studies, in all cases 5000 cells were seeded per well in 24-well plates. On day 5, one-tenth of the cells were harvested from one well and these were considered to be the progeny of 500 cells. Similarly, one-fifth of one well was considered to be the progeny of 1000 cells. Cells from two wells were considered to be the progeny of 10000 cells and 10 wells as the progeny of 50000 cells.

For the extended expansion culture without CPI203, expanded cells from either vehicle or CPI203 treated conditions were harvested at day 5 and resuspended in megakaryocyte expansion media (100ng/ml TPO and SCF 50ng/ml) for another five days for MK and ploidy analysis. The media used were Stemspan SFEM (StemCell Technologies #09650) + 1% Pen/Strep supplemented with recombinant human cytokine cocktail mixes (Peprotech) as previously described<sup>s7</sup>.

### **Flow cytometry and immunofluorescent staining**

Multicolour flow cytometry characterisation of cells was performed according to Notta *et al.*<sup>s3,s8</sup>. The antibodies used are listed in Supplemental Table 1. Briefly, cells were resuspended in human FcR blocking reagent diluted in MACS buffer (both from Miltenyi Biotec) and incubated for 10 min on ice. The cells were then incubated with a mixture of fluorescently labeled antibodies diluted in MACS buffer for 20 min on ice. Cells were washed once, resuspended in MACS buffer and acquired by flow cytometer. DAPI (Invitrogen) was added at 100ng/ml directly before acquisition to distinguish live and dead cells. HSPC subsets were determined by gating on single viable, Lin- (CD2, CD3, CD4, CD7, CD8a, CD10, CD11b, CD14, CD19, CD20, CD56 and CD235ab) cells, and defined as HSC: Lin-CD38<sup>low</sup>-CD34<sup>+</sup>CD45RA<sup>-</sup>CD90<sup>+</sup>CD49f<sup>+</sup>; MPP: Lin-CD38<sup>low</sup>-CD34<sup>+</sup>CD45RA<sup>-</sup>CD90<sup>-</sup>; LMPP: Lin-CD38<sup>low</sup>-CD34<sup>+</sup>CD45RA<sup>+</sup>CD90<sup>-</sup>; CMP: Lin-CD38<sup>+</sup>CD34<sup>+</sup>CD45RA<sup>-</sup>CD123<sup>+</sup>; GMP: Lin-CD38<sup>+</sup>CD34<sup>+</sup>CD45RA<sup>+</sup>CD123<sup>+</sup>; and MEP: Lin-CD38<sup>+</sup>CD34<sup>+</sup>CD45RA<sup>-</sup>CD123<sup>-</sup>. For megakaryocyte ploidy analysis, cells were stained with CD41 and CD42 for 20 minutes at 4°C, then centrifuged, suspended and incubate with Hoechst for 30 minutes at 37°C.

Flow cytometer was performed on FACSLSR II or X50 (BD Biosciences) using FACSDIVA™ software v.8.0.3. Gates were set using strict fluorescence-minus-one controls run for each sample and experiment. Data were analyzed on FlowJo software v.10.5.3 (Tree Star). In some cases, sorting of these subpopulations was carried out on a FACS Aria Fusion II (BD Biosciences). All cell counting was performed on aliquots of cell suspension using Countbright absolute counting beads (Molecular Probes) by flow cytometry.

### **Apoptosis assay**

After 5 days of culture, cells were resuspended in wells by pipetting up and down. 200ul of cell suspension was taken from each well and stained with Annexin V FITC (BD Biosciences) according to the manufacturer's instructions. Propidium iodide was added at 100ng/ml directly before acquisition on a LSR II flow cytometer (BD Biosciences). Cells were characterised as apoptotic (AnnexinV<sup>+</sup>/PI<sup>-</sup>) and dead (AnnexinV<sup>+</sup>/PI<sup>+</sup>) cells.

### **LTC-IC and CFU assays**

Long-term culture-initiating cells (LTC-ICs) assay were analysed following the protocol described previously<sup>s3</sup>. The murine stromal cell lines (M2-10B4 and SL/SL mixed at 1:1) were irradiated with 8000cGy and plated into 96-well collagen-coated microtiter plates (5,000 cells/well of each cell line) and cultured in long-term culture medium (MyeloCult H5100; Stem Cell Technologies) supplemented with hydrocortisone 21-hemi-succinate ( $10^{-6}$ M). The Lin-CD34+CD38-CD45RA-CD90+CD49f+ cells were plated at 10, 26, 50, 100, 150 and 200 cells per well by flow sorting (BD FACSAria Fusion II, 70uM nozzle, single cell mode, n=4-10). Co-cultures were maintained at 37°C in high humidity and with 50% medium exchange every week. After 6 weeks, all cells were plated in methylcellulose cultures supplemented with complete methylcellulose-based medium (MyeloCult H4435; Stem Cell Technologies). Long-term culture colony-forming cells (LTC-CFCs; readout of LTC-IC assay) were scored after an additional 14-16 days of culture. Only wells observed with colonies from all lineages (GM and BFU-E and/or GEMM) were counted as positive. The number of negative wells were analyzed by LDA software for estimating the frequency of LTC-IC (<http://bioinf.wehi.edu.au/software/elda/>)<sup>s9</sup>.

### **High-throughput RNA sequencing and bioinformatics analysis**

RNA was isolated from 100,000 CPI203/cytokines (150nM) or vehicle/cytokines (0.1% DMSO) expanded CB CD133+ cells using RNeasy Plus Mini Kit (QIAGEN) according to the manufacturer's protocol. mRNA capture and cDNA synthesis were performed using the KAPA mRNA Hyper Kit for illumine platform (KAPA) according to the manufacturer's protocol. After a quality check using the Qubit High-sensitivity kit (Life Technologies), 16 cycles of PCR were performed for amplifying each library. Each experiment starting from cell expansion was performed in duplicate using cells from three different biological donors. Amplified cDNA libraries were sequenced on an Illumina HiSeq 4000 machine using paired end reads (2 x 150 bp) at Novogene, China. Forty (40) million reads per sample were gained and raw files of the

same sample from different lanes were merged into a single file using Samtools (1.3). Processed files were then aligned using STAR (2.4.2a) against the human genome (UCSC hg38) and the quality was also checked by fastQC (0.10.1). The nonadjusted read counts for each gene were assessed statistically for global differential expression between the specified populations using the edgeR package (3.22.2) on R (3.5.1). Genes that are significant at a 1% false discovery rate (calculated using a BenajminiHochberg adjusted p-value) were considered differentially expressed between populations described<sup>s10</sup>. Gene ontology enrichment was assessed using the topGO package (2.32.0) and pathway enrichment was analysed on the ReactomePA package (1.24.0). Sequencing data have been submitted to the NCBI Gene Expression Omnibus (GSE GSE140813). UM171 and SR1 expanded cells' RNA sequencing results were obtain as raw fastq files from SRA (UM171: 35nM for 72h treatment, GSM1379040, SR1:500nM, 72h, GSM1379039 and DMSO: GSM1379038<sup>s11,s12</sup>). Reads were aligned using STAR (2.4.2a) against the human genome (UCSC hg38) and the read counts (combined with our data of CPI203 and vehicle). RNA sequencing results of primary human bone marrow subpopulations were obtained Gene Expression Omnibus (GEO) via accession GSE74912 and reads were aligned using STAR (2.4.2a) against the human genome (UCSC hg38) and the read counts (combined with our data of CPI203 and vehicle). When combining data sets, batch correction was performed using RUVSeq R package<sup>s13</sup> with the RUVg method and GAPDH, SDHA, B2M as housekeeping genes. Each gene was assessed statistically for global differential expression between the specified populations using the edgeR package (3.22.2) on R (3.5.1). Gene expression data of primary human bone marrow subpopulations (GSE74912) was used to create HSC/MPP UP and DOWN data sets. HSC+MPP samples were compared pairwise against each progenitor cell populations (GMP, CMP, LMPP, CLP, MEP). Genes that were significantly upregulated in all comparisons where used to create the HSC/MPP UP gene set while genes that were significantly down regulated in all comparisons were used to create the HSC/MPP DOWN gene set. Using these gene sets GSEA was performed using the fGSEA R package<sup>s14</sup>.

### ***In vivo* analyses**

Cord blood CD133+ cells with purity higher than 90% were used for *in vivo* analysis. Eight to twelve-week old NOD.B6.SCID Il2rg<sup>-/-</sup>Kit<sup>W41/W41</sup> (NBSGW) mice<sup>s15</sup> were transplanted with the specified number of cells or the progeny of expansion. Cells were injected into the tail vein. After 20-22 weeks, mice were euthanised by cervical dislocation and peripheral blood (PB), spleen and bone marrow (both femurs, BM) were collected. Spleens were mashed and filtered before analysis. Femurs were mashed with the back end of a syringe plunger in a 24 well plate, washed five times with 2ml PBS and BM collected through a 70mm filter before analysis. PB was collected in tubes containing heparin. Samples were either lysed with 3ml 1x RBC lysis buffer for 5 minutes or were unprocessed for erythrocyte analysis prior to antibody staining. Cell aliquots were stained as above in the Flow Cytometry protocol and the human grafts were analyzed by flow cytometry (BD FACS Canto II). The antibodies used are listed in Supplementary Table 1.

For secondary transplants, bone marrow cells from primary recipient mice in unexpanded, vehicle/cytokine-expanded or CPI203/cytokine-expanded groups (from mice in cell doses of 500, 1000 and 10000 cells) were pooled respectively and then 5 million cells were injected into each secondary recipient mouse. The engraftment of human cells were analysed 22 weeks post-transplantation. All mouse experiments were performed in accordance with the UK Animals (Scientific Procedures) Act 1986 and using protocols approved by the Committee on Animal Care and Ethical Review at the University of Oxford, under PPL number P8869535A.

### **Statistical analysis**

Statistical analysis was performed on GraphPad Prism 8.0. Data are shown as mean ± SEM. Two-tailed Student's t-tests were performed for statistical analysis between two groups. One-way ANOVA with multi-comparison (Fisher's LSD test) was used to compare differences in means among three groups. N.S  $p > 0.05$ ; \*  $p \leq 0.05$ ; \*\*,  $p \leq 0.01$ ; \*\*\*,  $p \leq 0.005$ .

**Supplemental Table 1. Antibodies Used for Flow Cytometry**

| <b>Name</b>                   | <b>Clone</b> | <b>Isotype</b> | <b>Conj.</b>     | <b>Company</b>       | <b>Dilution</b> |
|-------------------------------|--------------|----------------|------------------|----------------------|-----------------|
| hCD34                         | 581          | mlgG1          | AF700/APC        | BD                   | 1:60            |
| hCD34                         | Ef780        | 41211          | 47-0349 42       | Invitrogen           | 1:20            |
| hCD38                         | HIT2         | mlgG1          | PETxR/BB515      | BD                   | 1:40            |
| hCD45RA                       | HI100        | mlgG2bk        | APC-H7           | BD                   | 1:50            |
| hCD90                         | 5E10         | mlgG1          | PE               | Biolegend            | 1:50            |
| hCD49f                        | GoH3         | rlgG2a         | PE-Cy7           | Biolegend            | 1:120           |
| hCD133                        | 293C3        | mlgG2b         | APC              | Miltenyi             | 1:30            |
| hCD123                        | 6H6          | mlgG1k         | PerCP-Cy5.5      | Biolegend            | 1:50            |
| hCD2                          | RPA-2.10     | mlgG1          | PE-Cy5           | Biolegend            | 1:150           |
| hCD3                          | HIT3a        | mlgG2a         | PE-Cy5           | Biolegend            | 1:200           |
| hCD4                          | RPA-T4       | mlgG1          | PE-Cy5           | Biolegend            | 1:150           |
| hCD7                          | CD7-6B7      | mlgG1          | PE-Cy5           | Biolegend            | 1:150           |
| hCD8a                         | RPA-T8       | mlgG1          | PE-Cy5           | Biolegend            | 1:200           |
| hCD10                         | HI10a        | mlgG1          | PE-Cy5           | Biolegend            | 1:80            |
| hCD11b                        | ICRF44       | mlgG1          | PE-Cy5/APC       | Biolegend/Invitrogen | 1:80            |
| hCD14                         | 61D3         | mlgG2a         | PE-Cy5/APC       | eBio                 | 1:80            |
| hCD19                         | HIB19        | mlgG1          | PE-Cy5           | Biolegend            | 1:200           |
| hCD20                         | 2H7          | mlgG2a         | PE-Cy5           | Biolegend            | 1:150           |
| hCD56                         | B159         | mlgG1          | PE-Cy5           | BD                   | 1:20            |
| hCD235ab                      | HIR2         | mlgG2b         | PE-Cy5/eFluor450 | Biolegend            | 1:1200          |
| hCD41a                        | HIP8         | mlgG1          | APC              | eBioscience          | 1:20            |
| hCD41                         | HIP8         | mlgG1k         | PE-Cy7           | Biolegend            | 1:20            |
| hCD42b                        | HIP1         | mlgG1k         | PE               | Biolegend            | 1:20            |
| hCD71                         | M-A712       | mlgG2a         | AF700            | BD                   | 1:20            |
| DAPI                          |              |                |                  | Biolegend            | 100ng/ml        |
| 7AAD                          |              |                |                  | eBio                 | 1:200           |
| Hoechst                       |              |                |                  | Thermo Fisher        | 1:100           |
| hCD45                         | HI30         | mlgG1          | APC              | Invitrogen           | 1:10            |
| mCD45                         | 30-F11       | RIgG2b         | eFluor450        | eBio                 | 1:10            |
| hCD3                          | HIT3a        | mlgG2a         | PE-Cy5           | Biolegend            | 1:200           |
| hCD19                         | HIB19        | mlgG1          | PE-Cy5           | Biolegend            | 1:200           |
| hCD33                         | HIB19        | mlgG1          | PE-Cy5           | Biolegend            | 1:200           |
| mT119                         | TER-119      | Rat / IgG2b    | FITC             | eBio                 | 1:50            |
| Anti-Human Lineage Cocktail 1 |              |                |                  | BD                   | 1:50            |

**Supplemental Table 2. Determination of SRC (SCID-repopulating cells) frequency in vehicle or CPI203 treated group.**

| <b>Culture Condition</b>          | <b>Number of injected cells</b>         |                                         | <b>Number of mice with &gt;1% human CD45+ cell chimerism/total number of mice</b> | <b>1/SRC frequency in total number of cells transplanted</b> | <b>80% confidence interval (upper, lower)</b> |
|-----------------------------------|-----------------------------------------|-----------------------------------------|-----------------------------------------------------------------------------------|--------------------------------------------------------------|-----------------------------------------------|
| <b>Unexpanded</b>                 | 500                                     |                                         | 1/3                                                                               | 1790                                                         | 773,4144                                      |
|                                   | 1,000                                   |                                         | 1/3                                                                               |                                                              |                                               |
|                                   | 10,000                                  |                                         | 3/3                                                                               |                                                              |                                               |
|                                   | 50,000                                  |                                         | 3/3                                                                               |                                                              |                                               |
| <b>Vehicle/cytokines-expanded</b> | <b>Equivalent starting cell number*</b> | <b>Actual number of cells injected*</b> |                                                                                   |                                                              |                                               |
|                                   | 500                                     | $8.0 \times 10^3 \pm 2.5 \times 10^2$   | 1/3                                                                               | 1790                                                         | 773,4144                                      |
|                                   | 1,000                                   | $1.6 \times 10^4 \pm 1.1 \times 10^3$   | 1/3                                                                               |                                                              |                                               |
|                                   | 10,000                                  | $1.6 \times 10^5 \pm 2.3 \times 10^3$   | 3/3                                                                               |                                                              |                                               |
|                                   | 50,000                                  | $8.0 \times 10^5 \pm 1.7 \times 10^3$   | 3/3                                                                               |                                                              |                                               |
| <b>CPI203/cytokines-expanded</b>  | 500                                     | $3.0 \times 10^3 \pm 5.1 \times 10^2$   | 4/4                                                                               | 1                                                            | 1,462                                         |
|                                   | 1,000                                   | $5.9 \times 10^3 \pm 2.2 \times 10^2$   | 4/4                                                                               |                                                              |                                               |
|                                   | 10,000                                  | $6.1 \times 10^4 \pm 0.5 \times 10^3$   | 3/3                                                                               |                                                              |                                               |
|                                   | 50,000                                  | $3.0 \times 10^5 \pm 2.6 \times 10^3$   | 3/3                                                                               |                                                              |                                               |

\* For *in vivo* studies, in all cases 5000 cells were seeded per well in 24-well plates. On day 5, one-tenth of the cells were harvested from one well and these were considered to be the progeny of 500 cells. Similarly, one-fifth of one well was considered to be the progeny of 1000 cells. Cells from two wells were considered to be the progeny of 10000 cells and 10 wells as the progeny of 50000 cells.



**Supplemental Table 3. Frequencies of human cells in the NBSGW mouse bone marrow after primary transplantation.**

| Group                      | Initiating cell number | % in bone marrow (no RBC)<br>Mean±SEM |          |           |         |             | % in bone marrow (before RBC-lysis)<br>Mean±SEM |
|----------------------------|------------------------|---------------------------------------|----------|-----------|---------|-------------|-------------------------------------------------|
|                            |                        | hCD45+                                | hCD33+   | hCD19+    | hCD3+   | hCD34+Lin-* | hCD235a+                                        |
| Unexpanded                 | 50000                  | 84.8±5.5                              | 21.2±4.4 | 62.3±6.0  | 1±0.8   | 11.9±1.3    | 84.4±1.0                                        |
| Unexpanded                 | 10000                  | 69.6±5.0                              | 13.7±3.6 | 52.1±4.7  | 1.2±0.6 | 8.4±0.9     | 80.4±3.6                                        |
| Unexpanded                 | 1000                   | 8.1±8.2                               | 0±0      | 0±0       | 0±0     | 0.1±0.1     | 4.8±4.8                                         |
| Unexpanded                 | 500                    | 0.7±0.6                               | 0±0      | 0±0       | 0±0     | 0±0         | 3.3±3.1                                         |
| Vehicle/cytokines-expanded | 50000                  | 87.9±8.3                              | 12.4±2.2 | 67.7±7.6  | 0.7±0.4 | 11.8±1.9    | 87.8±3.7                                        |
| Vehicle/cytokines-expanded | 10000                  | 54.9±23.5                             | 3.2±1.2  | 46.1±20.4 | 0.2±0.1 | 3.7±2.1     | 63.4±19.2                                       |
| Vehicle/cytokines-expanded | 1000                   | 1.2±0.4                               | 0±0      | 0.9±0.2   | 0±0     | 0±0         | 3.7±3.5                                         |
| Vehicle/cytokines-expanded | 500                    | 1.5±1.4                               | 0±0      | 1.5±1.4   | 0±0     | 0±0         | 7.5±6                                           |
| CPI203/cytokines-expanded  | 50000                  | 89.8±6.2                              | 12.2±3.9 | 69.0±6.2  | 1.2±1.1 | 14.1±0.9    | 85.7±3.5                                        |
| CPI203/cytokines-expanded  | 10000                  | 60.2±21.7                             | 6.2±2.8  | 47.4±16.6 | 0.4±0.1 | 4.6±2.3     | 68.6±17.4                                       |
| CPI203/cytokines-expanded  | 1000                   | 35.8±10.0                             | 2.1±1.1  | 31.8±8.8  | 0.2±0.1 | 0.2±0.1     | 25.9±9.6                                        |
| CPI203/cytokines-expanded  | 500                    | 23.1±5.9                              | 0.7±0.2  | 20.1±5.9  | 1.4±1.2 | 0.2±0.1     | 40.1±15.2                                       |

\*Lineage here includes CD3, CD14, CD16, CD19, CD20 and CD56

**Supplemental Table 4. Frequencies of human cells in the NSBGW mouse spleen and peripheral blood after primary transplantation.**

| Group                      | Initiating cell number | % in Spleen (no RBC)<br>Mean±SEM | % in peripheral blood (no RBC)<br>Mean±SEM |
|----------------------------|------------------------|----------------------------------|--------------------------------------------|
|                            |                        | hCD45+                           | hCD45+                                     |
| Unexpanded                 | 50000                  | 91.4±3.5                         | 34.6±12.8                                  |
| Unexpanded                 | 10000                  | 75.6±8.6                         | 20.1±4.6                                   |
| Unexpanded                 | 1000                   | 7.6±7.4                          | 0.4±0.4                                    |
| Unexpanded                 | 500                    | 2.1±1.4                          | 0.0±0.0                                    |
| Vehicle/cytokines-expanded | 50000                  | 87.3±10.6                        | 47±21.1                                    |
| Vehicle/cytokines-expanded | 10000                  | 51.4±22.8                        | 47±21.1                                    |
| Vehicle/cytokines-expanded | 1000                   | 3.9±3.2                          | 0.4±0.1                                    |
| Vehicle/cytokines-expanded | 500                    | 4.5±3.3                          | 0.2±0.2                                    |
| CPI203/cytokines-expanded  | 50000                  | 91.3±5.4                         | 41.3±21.3                                  |
| CPI203/cytokines-expanded  | 10000                  | 50.9±15                          | 7.0±4.5                                    |
| CPI203/cytokines-expanded  | 1000                   | 38.6±13.1                        | 3.5±2.7                                    |
| CPI203/cytokines-expanded  | 500                    | 37.6±13.2                        | 5.8±3.2                                    |

**Supplemental Table 5. Frequencies of human cells in NBSGW mice after secondary transplantation.**

| Group                      | % in bone marrow<br>Mean±SEM |         |         |           |                 |          | % in Spleen (no RBC)<br>Mean±SEM | % in peripheral blood (no RBC)<br>Mean±SEM |
|----------------------------|------------------------------|---------|---------|-----------|-----------------|----------|----------------------------------|--------------------------------------------|
|                            | hCD45+                       | hCD33+  | hCD19+  | hCD3+     | hCD34+<br>Lin-* | hCD235a+ | hCD45+                           | hCD45+                                     |
| Unexpanded                 | 0.4±0.1                      | 0.3±0.1 | 0.0±0.0 | 0.19±0.09 | 0.0±0.0         | 0.9±0.3  | 0.2±0.1                          | 0.0±0.0                                    |
| Vehicle/cytokines-expanded | 0.3±0.2                      | 0.3±0.2 | 0.0±0.0 | 0.01±0.00 | 0.0±0.0         | 0.3±0.0  | 0.5±0.5                          | 0.1±0.0                                    |
| CPI203/cytokines-expanded  | 7.2±2.9                      | 2.0±1.1 | 2.4±2.1 | 0.02±0.01 | 0.4±0.2         | 3.1±1.0  | 3.5±1.7                          | 0.8±0.2                                    |

\*Lineage here includes CD3, CD14, CD16, CD19, CD20 and CD56

**Supplemental Table 6. Top 20 GO biological processes enriched in the differentially expressed genes when comparing vehicle and CPI203 expanded cells**

|    | GO.ID      | Term                                        | Annotated | Significant | Expected | Rank in cl: classic | KS      | weight  |
|----|------------|---------------------------------------------|-----------|-------------|----------|---------------------|---------|---------|
| 1  | GO:0006952 | defense response                            | 1518      | 213         | 114.44   | 2                   | 3.6e-20 | < 1e-30 |
| 2  | GO:0035588 | G-protein coupled purinergic receptor si..  | 23        | 13          | 1.73     | 28                  | 1.3e-09 | 0.5570  |
| 3  | GO:0031295 | T cell costimulation                        | 79        | 22          | 5.96     | 56                  | 5.1e-08 | 0.0023  |
| 4  | GO:0015671 | oxygen transport                            | 15        | 9           | 1.13     | 75                  | 2.5e-07 | 0.9804  |
| 5  | GO:0032729 | positive regulation of interferon-gamma ..  | 63        | 17          | 4.75     | 102                 | 2.7e-06 | 3.5e-09 |
| 6  | GO:0045055 | regulated exocytosis                        | 739       | 96          | 55.71    | 60                  | 8.7e-08 | 4.2e-17 |
| 7  | GO:0006955 | immune response                             | 1995      | 248         | 150.4    | 4                   | 1.4e-16 | < 1e-30 |
| 8  | GO:0048469 | cell maturation                             | 155       | 29          | 11.69    | 109                 | 4.3e-06 | 1.5e-09 |
| 9  | GO:0032496 | response to lipopolysaccharide              | 304       | 46          | 22.92    | 114                 | 4.4e-06 | 2.5e-28 |
| 10 | GO:0070374 | positive regulation of ERK1 and ERK2 ca     | 181       | 30          | 13.65    | 165                 | 3.5e-05 | 1.1e-27 |
| 11 | GO:0042493 | response to drug                            | 408       | 54          | 30.76    | 166                 | 3.6e-05 | 1.4e-27 |
| 12 | GO:0010771 | negative regulation of cell morphogenesi.   | 76        | 17          | 5.73     | 169                 | 4.0e-05 | 0.0016  |
| 13 | GO:0061614 | pri-miRNA transcription from RNA polym      | 30        | 10          | 2.26     | 174                 | 4.2e-05 | 6.0e-05 |
| 14 | GO:0007155 | cell adhesion                               | 1343      | 182         | 101.25   | 5                   | 1.1e-15 | < 1e-30 |
| 15 | GO:0045058 | T cell selection                            | 46        | 14          | 3.47     | 110                 | 4.3e-06 | 1.4e-05 |
| 16 | GO:0003018 | vascular process in circulatory system      | 154       | 26          | 11.61    | 192                 | 8.3e-05 | 1.1e-16 |
| 17 | GO:0042102 | positive regulation of T cell proliferat... | 95        | 19          | 7.16     | 189                 | 7.4e-05 | 1.4e-12 |
| 18 | GO:1902105 | regulation of leukocyte differentiation     | 239       | 38          | 18.02    | 130                 | 9.2e-06 | 3.1e-28 |
| 19 | GO:0007626 | locomotory behavior                         | 192       | 30          | 14.47    | 202                 | 0.00011 | 8.6e-08 |
| 20 | GO:0010863 | positive regulation of phospholipase C a..  | 35        | 10          | 2.64     | 222                 | 0.00018 | 0.0096  |

**A**

| Name         | Target                                     |
|--------------|--------------------------------------------|
| (+)-JQ1      | BRD2, BRD3, BRD4, BRDT                     |
| (-)-JQ1      | BRD2, BRD3, BRD4, BRDT<br>(- ent inactive) |
| PFI-1        | BRD2, BRD3, BRD4, BRDT (BET)               |
| GSK2801      | BAZ2A, BAZ2B                               |
| I-CBP112     | CREBBP, EP300                              |
| SGC-CBP30    | CREBBP, EP300                              |
| Bromosporine | pan-Bromodomain                            |
| PFI-3        | SMARCA, PB1                                |
| OXF-BD-02    | BRD2, BRD3, BRD4, BRDT (BET)               |
| CPI203       | BRD4                                       |

**B**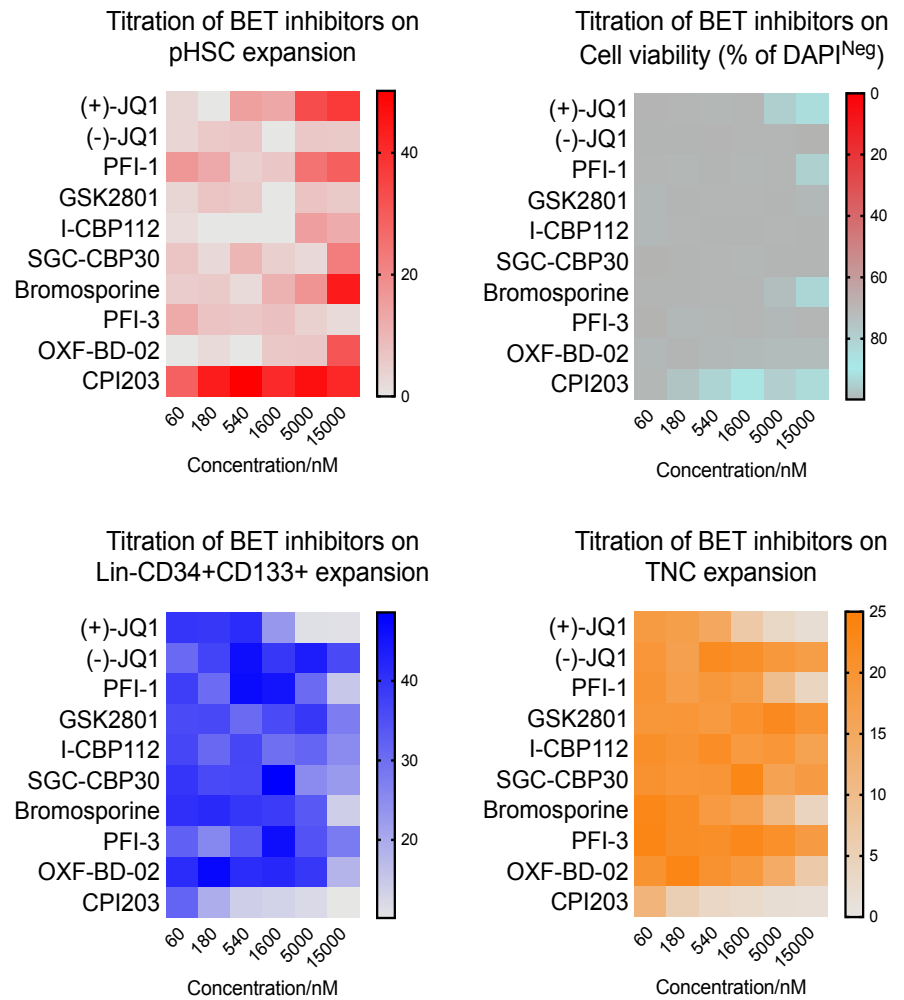

### Supplemental Figure 1. Selected BCP inhibitors and the effect on UCB CD133+ cells during 5-day expansion

A) Name, structure and targets of selected BCP inhibitors. All BCP inhibitors were tested on CD133+ cells originating from six different biological donors respectively. B) Fold change of pHSC: Lin-CD38-CD34+CD45RA-CD90+CD49f+, Lin-CD34+CD133+ cells, total nucleated cells and the proportion of cells negative with DAPI (before spin down) were shown in various concentrations of BCP inhibitors from 60nM to 15000nM.

**Supplemental Figure 2. Assessment of UCB CD133+ HSC and progenitor cells expansion during 5 days culture with cytokines and CPI203 or vehicle**

**A)** Fold change of total nucleated cells, proportion of cells negative with DAPI, absolute number of HSPC: Lin-CD34+, Lin+, Lin- cells, Lin-CD34+CD38+/- cells, MPP: Lin-CD38-CD34+CD45RA-CD90-, LMPP: Lin-CD38-CD34+CD45RA+CD90- and MEP: Lin-CD34+CD38+CD123-CD45RA- were analyzed from 24 hours after treatment until day 5 (n=2-5, \*,  $p \leq 0.05$ ; \*\*,  $p \leq 0.01$ ; \*\*\*,  $p \leq 0.005$ . Each well seeded with 5000 cells). **B)** Limiting dilution analysis (LDA) for quantitating LTC-ICs present in the unexpanded and CPI203 or vehicle expanded Lin-CD34+CD38-CD45RA-CD90+CD49f+ cell subsets (n=4-10). **C)** Flow plots showing Annexin V+PI- (Apoptotic) and Annexin V+PI+ (Dead) cells in cytokine containing medium supplemented with CPI203 or the vehicle control (n=3) did not differ on day 5 of expansion.

Supplemental Figure.2

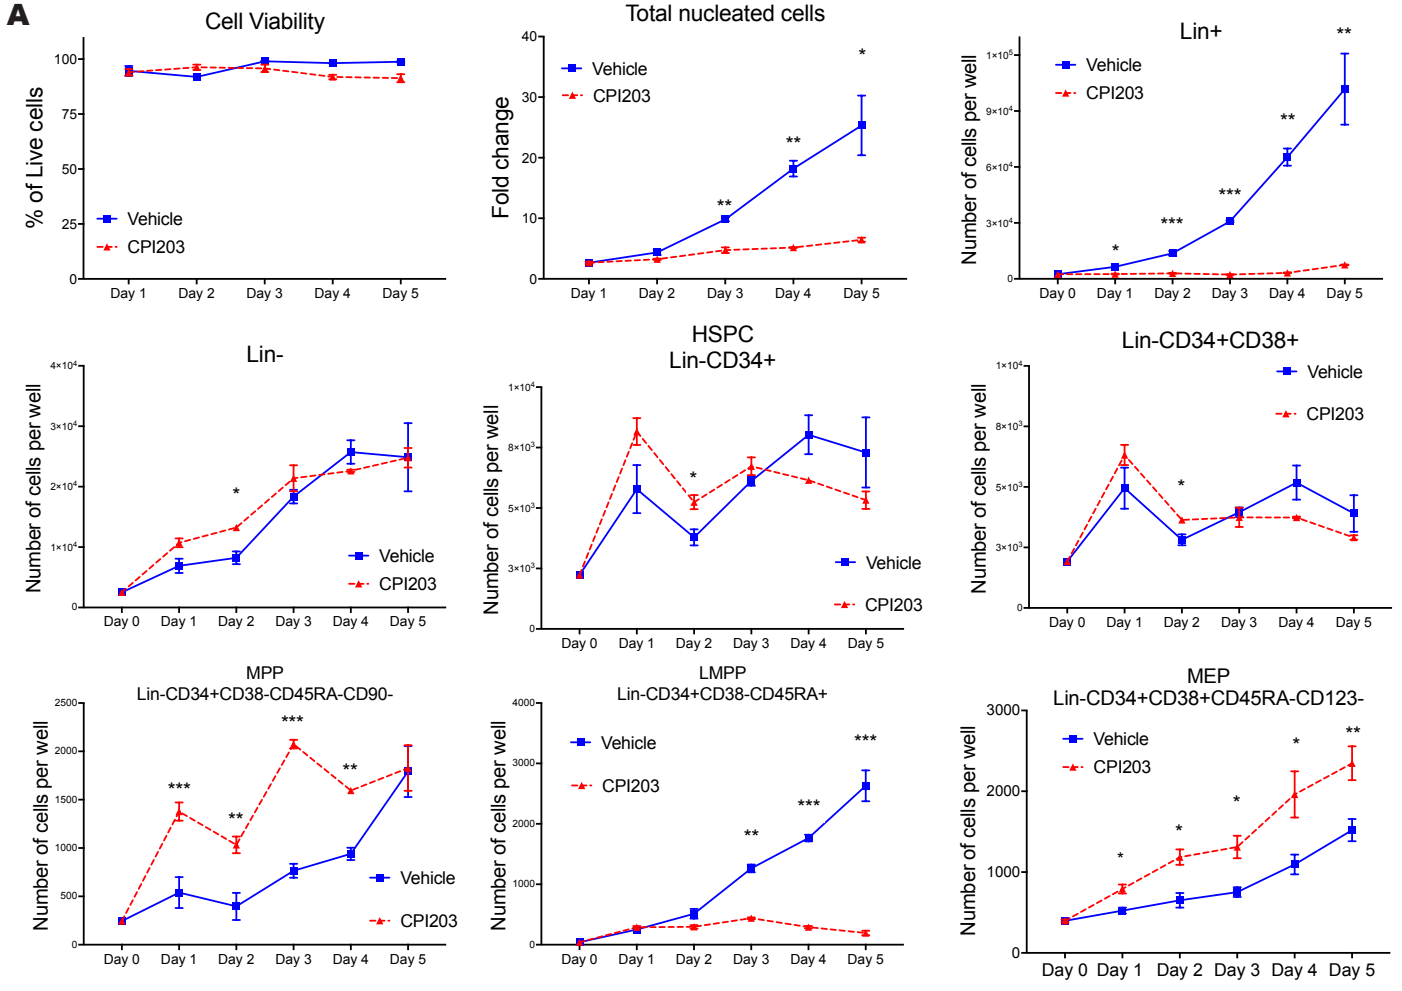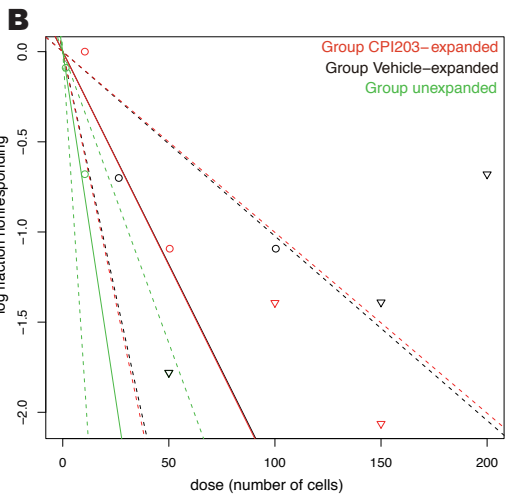

Confidence intervals for 1/(stem cell frequency)

| Group            | Lower | Estimate | Upper |
|------------------|-------|----------|-------|
| CPI203-expanded  | 97.8  | 42.4     | 18.5  |
| Vehicle-expanded | 99.7  | 42.2     | 18.0  |
| unexpanded       | 30.9  | 12.9     | 5.6   |

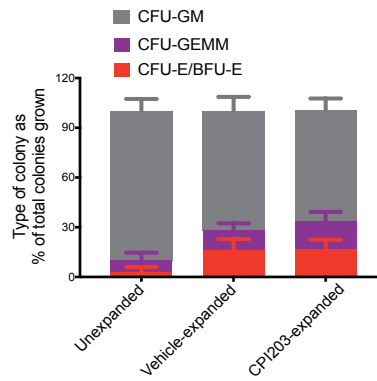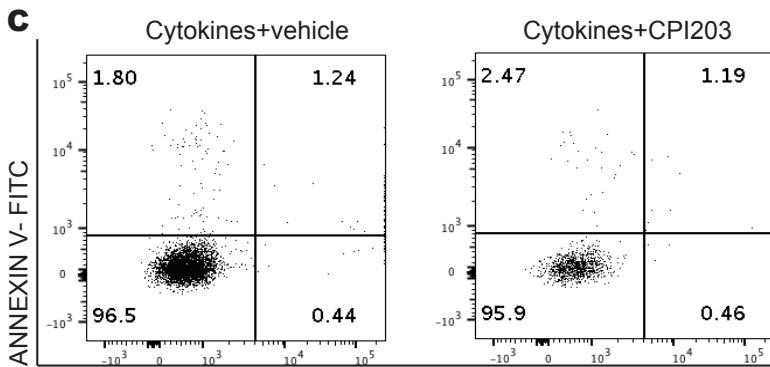

PI

**Supplemental Figure 3. *In vivo* analysis of the engraftment capacity in bone marrow of expanded cells in primary transplanted mice**

Bone marrow cells harvested from each mouse injected with 500 cells or progeny of that number show significant more human cells in CPI203/cytokines-expansion conditions: **A)** human CD45+; **B)** CD3+ T cells and CD19+ B cells; **C)** Lin-CD34+ HSPC; **D)** CD33+ cells; **E)** CD235a+ cells. **F)** Dot plots showing the quantitative data in all bone marrow cells collected from each mouse injected with varying cell doses (n=3-4; \*,  $p \leq 0.05$ ; \*\*,  $p \leq 0.01$ ; One-way ANOVA with multiple comparison (Fisher's LSD)).

Supplemental Figure.3

**A**

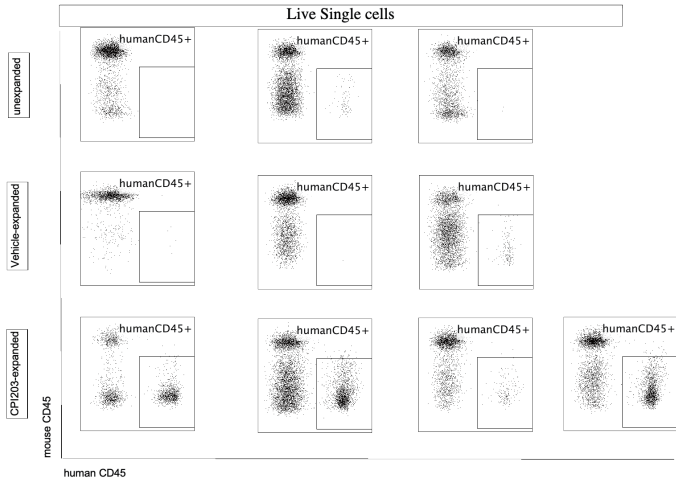

**B**

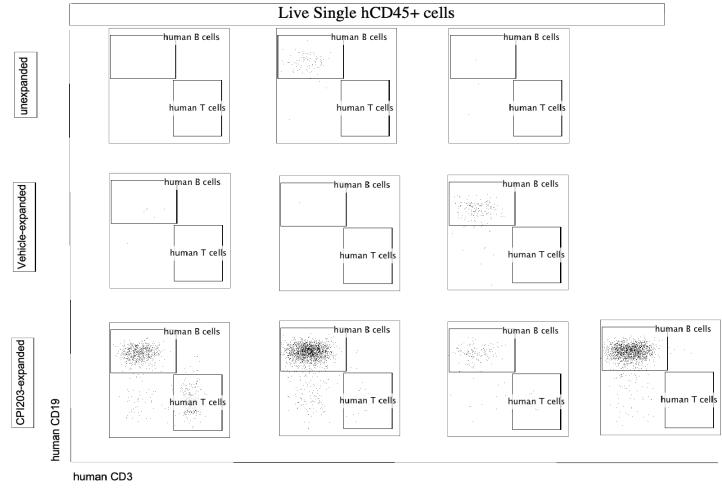

**C**

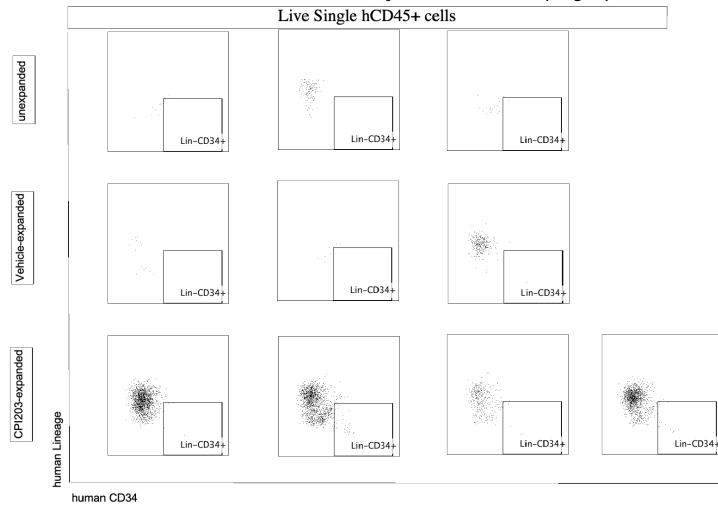

**D**

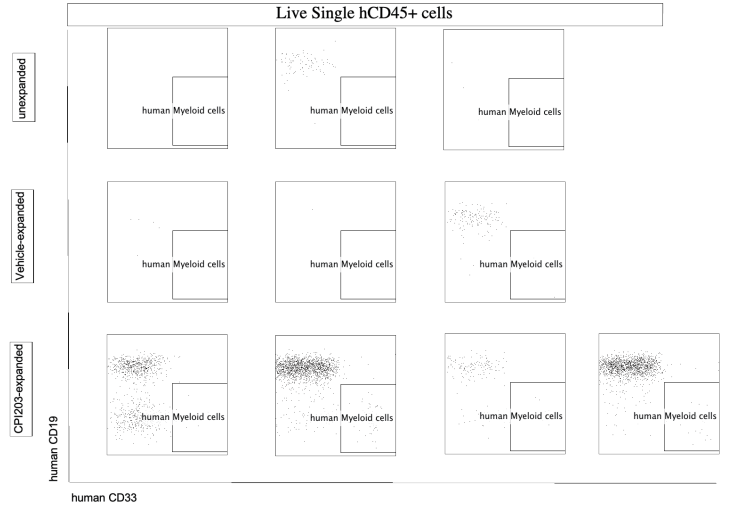

**E**

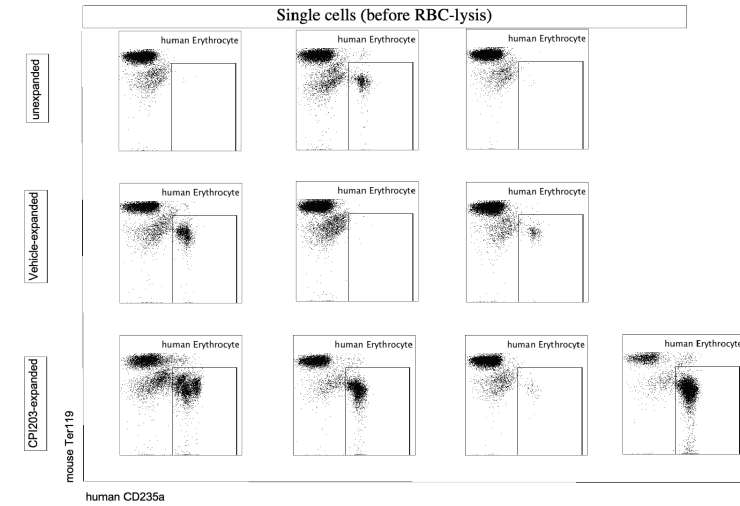

**F**

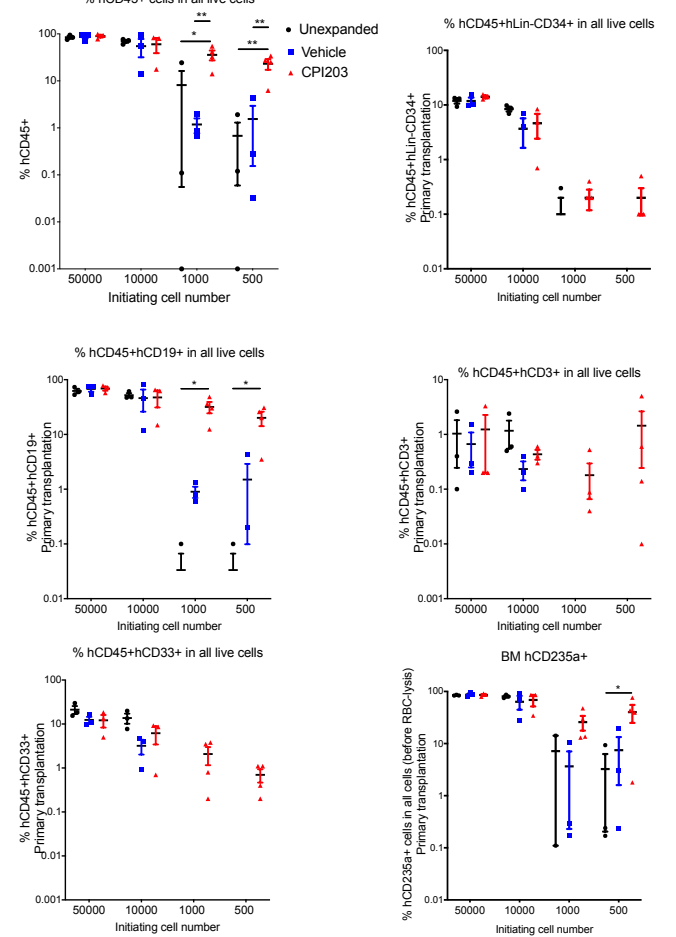



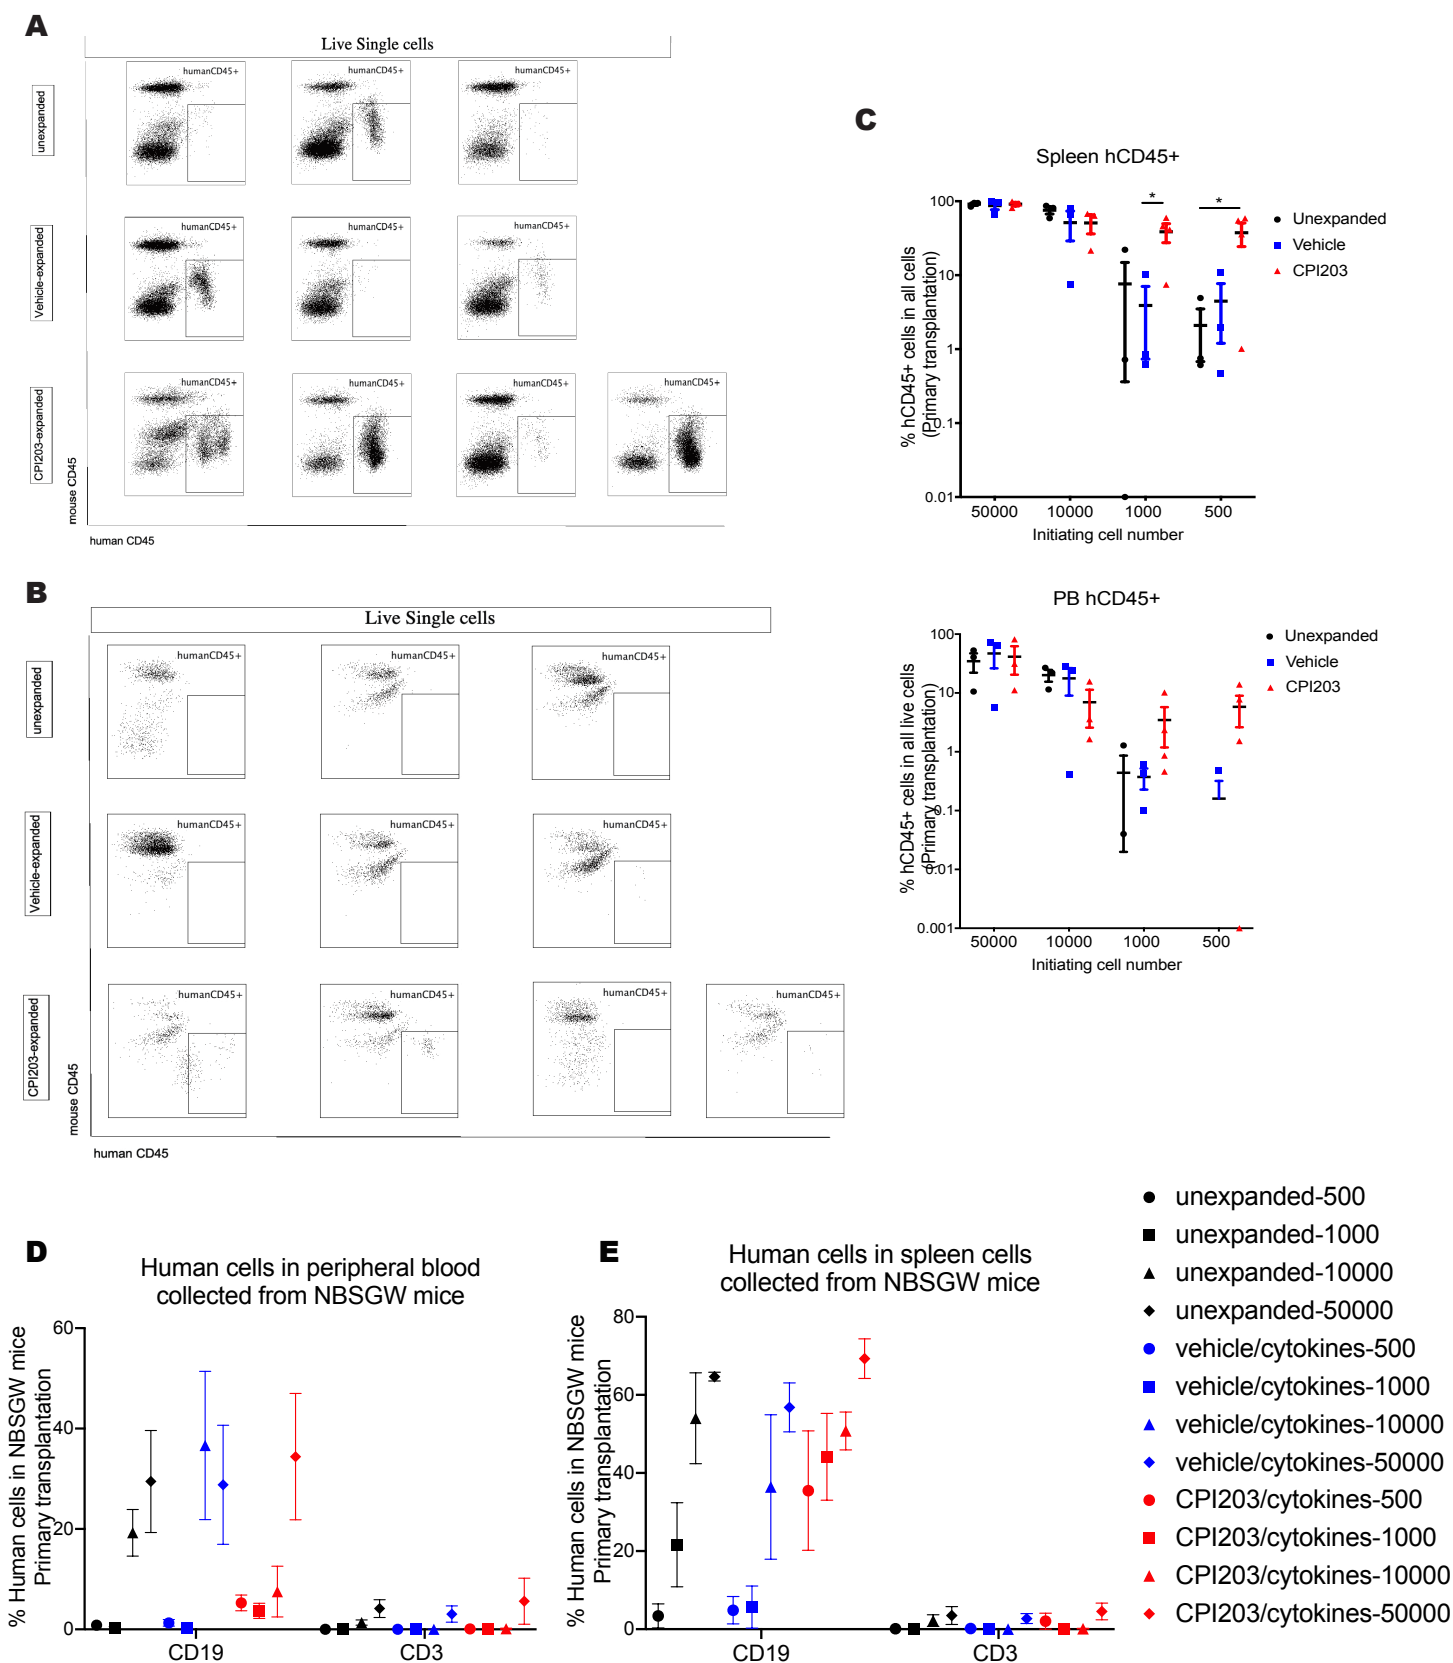

### Supplemental Figure 4. In vivo analysis of the engraftment capacity of expanded cells in primary transplanted mice

A) Spleen cells harvested from each mouse injected with 500 cells or progeny of that number show significant more human cells in CPI203/cytokines expansion conditions. B) Peripheral blood cells harvested from 500-cell initiated mice show significantly more human cells in CPI203-expansion conditions. C) Dot plots show the percentage of hCD45+ human cells in all spleen or peripheral blood cells analyzed (n=3-4; \*, p<0.05; One-way ANOVA with multiple comparison (Fisher's LSD)). D) The average reconstitution level of human CD19 and CD3 in peripheral blood samples collected from each group of mice (error bar shows SEM, n=3-4). E) The average reconstitution level of human CD19 and CD3 in spleen samples collected from each group of mice (error bar shows SEM, n=3-4).

**Supplemental Figure 5. *In vivo* analysis of the engraftment capacity of expanded cells in secondary transplanted mice**

**A)** Cells from each mouse injected with same amount of bone marrow cells harvested from primary transplanted mice show significantly more human leukocytes in CPI203/cytokines-expanded conditions. **A)** human CD45+ cells; **B)** Lin-CD34+ cells ; **C)** CD3+ cells and CD19+ cells; **D)** CD33+ cells; **E)** CD235a+ cells. **F)** Dot plots showing the quantitative data from all bone marrow cells collected from each mouse (n=3-4; \*,  $p \leq 0.05$ ; One-way ANOVA with multiple comparison (Fisher's LSD)).

**A**

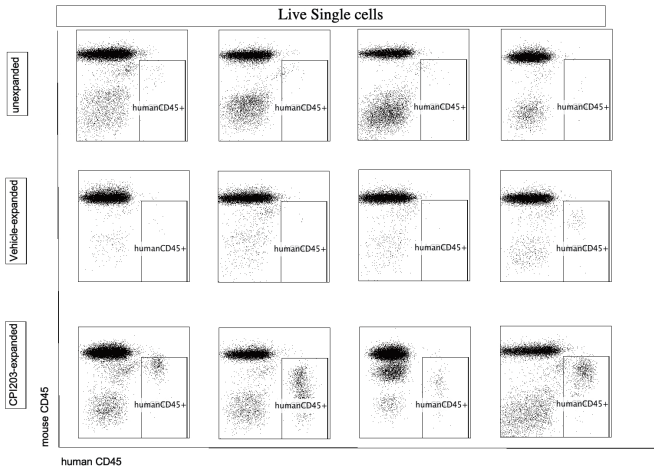

**B**

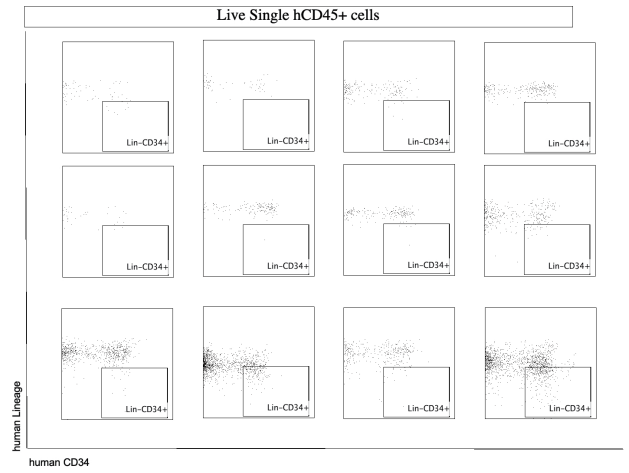

**C**

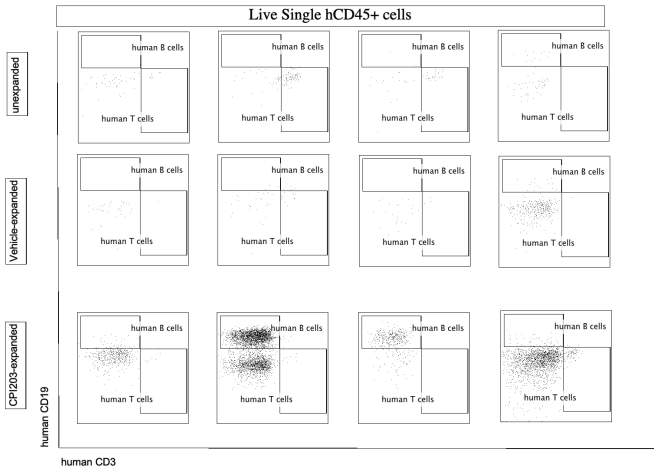

**D**

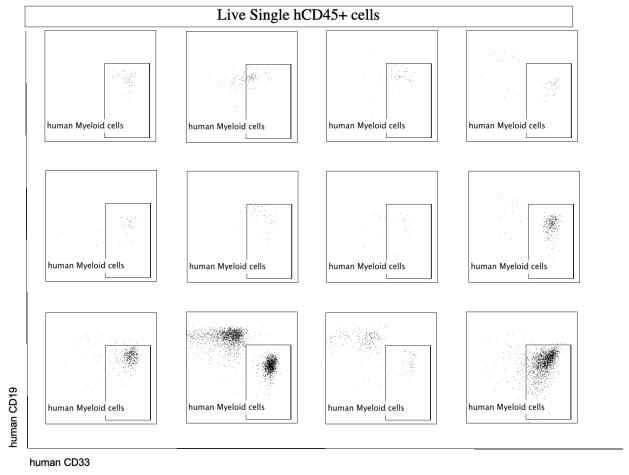

**E**

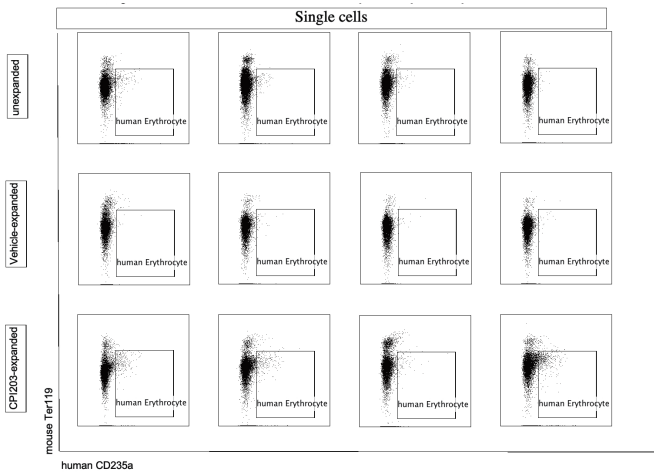

**F**

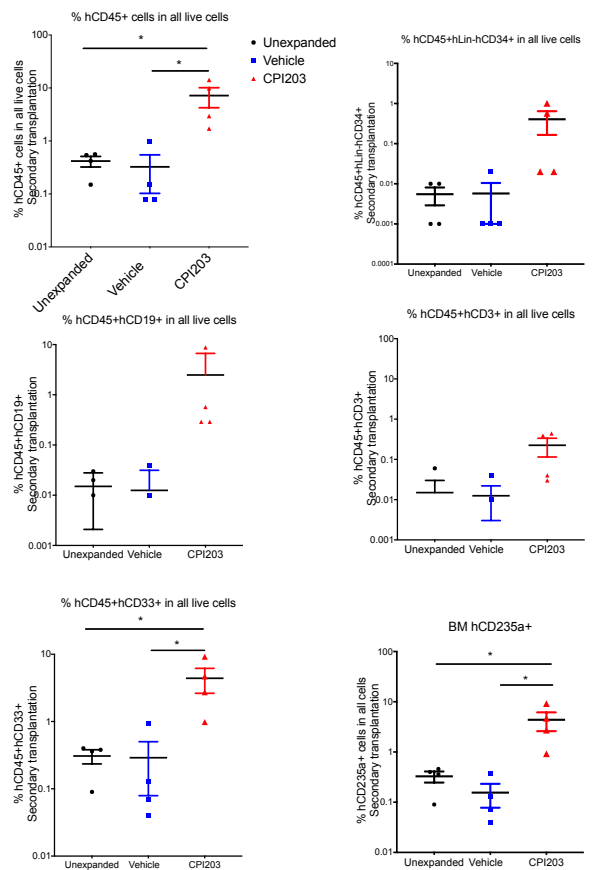

**A**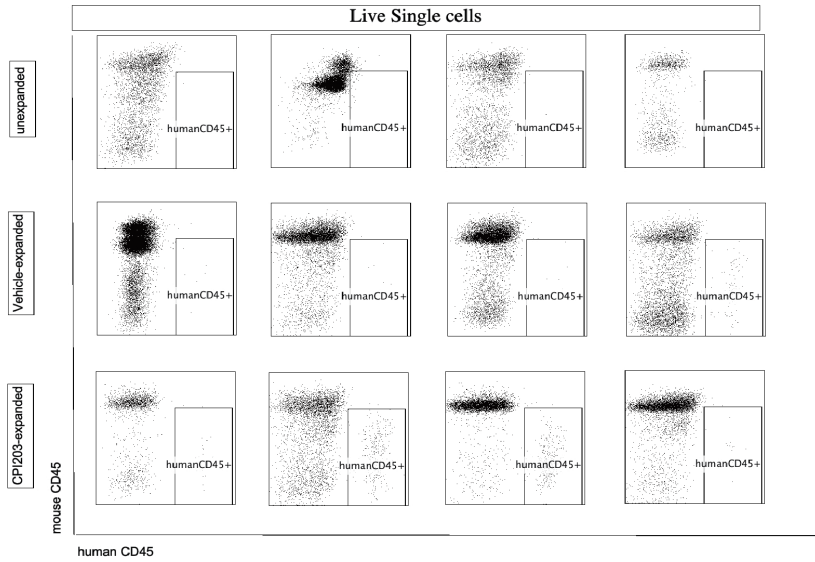**B**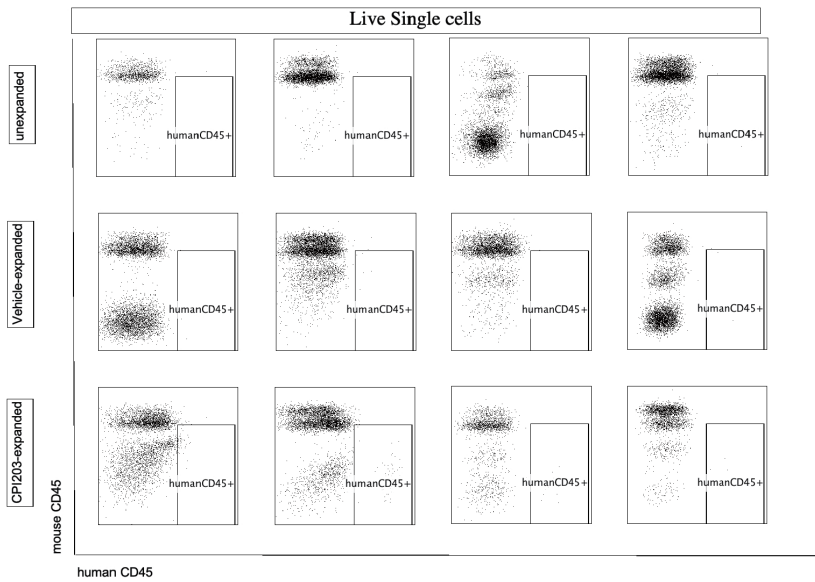**C**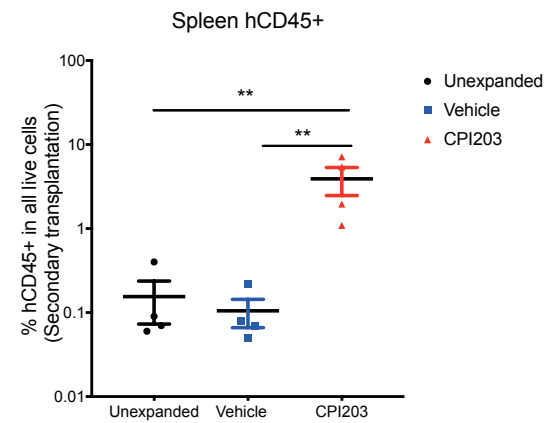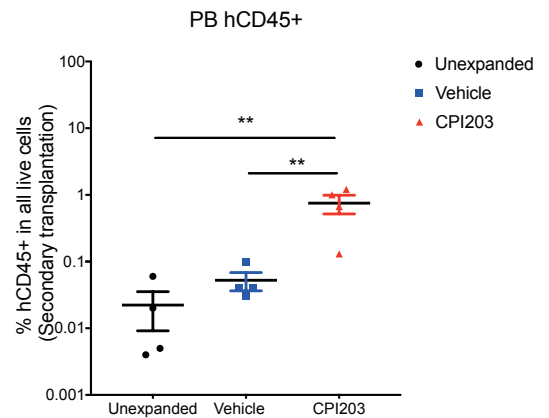

### Supplemental Figure 6. In vivo analysis of the engraftment capacity of expanded cells in secondary transplanted mice

A) Spleen cells from each mouse injected with same amount of bone marrow cells harvested from primary transplanted mice show significantly more human cells in CPI203/cytokine-expanded condition. B) Peripheral blood cells from each mouse injected with same amount of bone marrow cells harvested from primary transplanted mice show significantly more human cells in CPI203/cytokines-expanded condition. C) Dot plots show the percentage of hCD45+ human cells in all spleen or peripheral blood cells analysed (n=3-4; \*\*, p<0.01; One-way ANOVA with multiple comparison (Fisher's LSD)).

**Supplemental Figure7: CPI203 treated cord blood cells maintain an HSC/MPP gene signature.**

**A)** GSEA shows that genes up regulated by CPI203 treatment are significantly ( $p < 0.005$ ) enriched for genes in an HSC/MPP gene set which contain genes up regulated in HSC/MPP cells compared to downstream progenitors (191 genes). Conversely, CPI203 treatment led to down regulation of genes in a gene set which contained genes down regulated in HSC/MPP cells compared to downstream progenitors (226 genes). **B)** Heatmap shows the expression level of selected genes in cord blood cells treated with CPI203 with corresponding vehicle control samples as well as UM171 (35nM, 72h, GM1379040) and SR1 (500nM, 72h, GM13790389) treated cells with corresponding DMSO treated controls (GM13790388).

A.

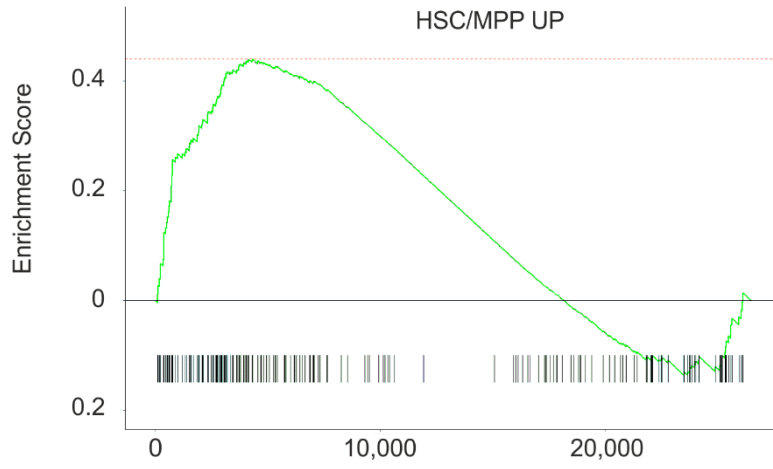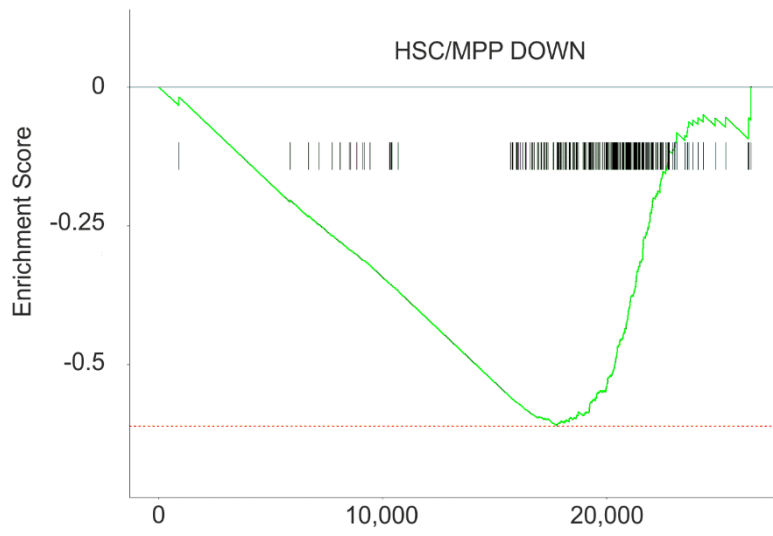

B.

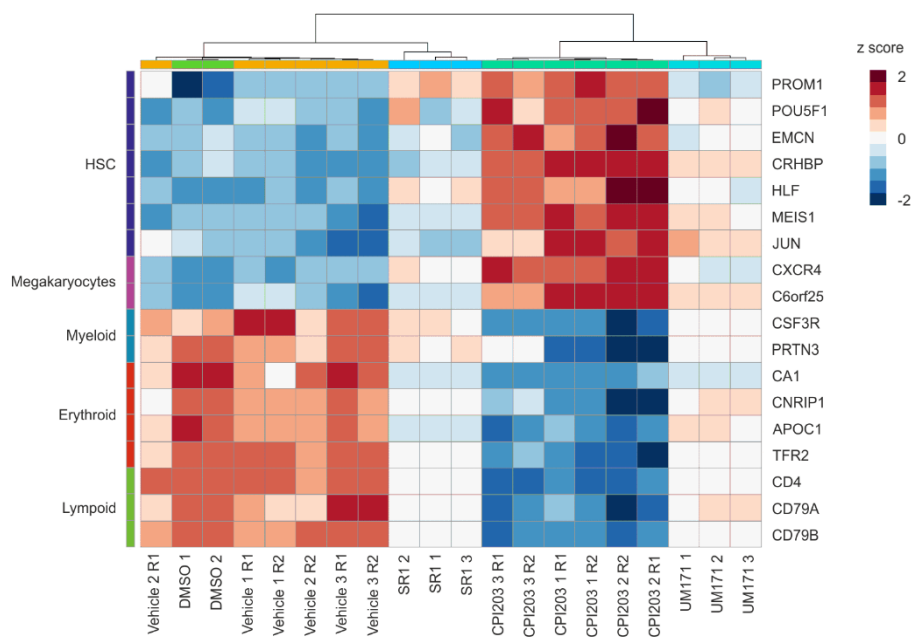

## Supplemental References:

- s1. Gullo F, Van Der Garde M, Russo G, et al. Computational modeling of the expansion of human cord blood CD133+ hematopoietic stem/progenitor cells with different cytokine combinations. *Bioinformatics*. 2015;31(15):2514-2522.
- s2. Watt SM, Peng H. Umbilical cord blood hematopoietic stem and progenitor cell expansion for therapeutic use. In ed Mauricio AC. *Umbilical Cord Blood Banking for Clinical Application and Regenerative Medicine*. Chapter 6, 1<sup>st</sup> edition, London, UK; InTechOpen Press; 2017.
- s3. Hua P, Kronsteiner B, van der Garde M, et al. Single-cell assessment of transcriptome alterations induced by Scriptaid in early differentiated human haematopoietic progenitors during ex vivo expansion. *Scientific Reports*. 2019;9(1):5300.
- s4. Jennings LE, Schiedel M, Hewings DS, et al. BET bromodomain ligands: Probing the WPF shelf to improve BRD4 bromodomain affinity and metabolic stability. *Bioorg Med Chem*. 2018;26(11):2937-2957.
- s5. Schiedel M, Moroglu M, Ascough DMH, et al. Chemical epigenetics: the impact of chemical and chemical biology techniques on bromodomain target validation. *Angew Chem Int Ed Engl*. 2019;58(50):17930-17952.
- s6. Zaware N, Zhou MM. Bromodomain biology and drug discovery. *Nat Struct Mol Biol*. 2019;26(10):870 - 879.
- s7. Psaila B, Wang G, Meira AR, et al. Single-cell analyses reveal aberrant pathways for megakaryocyte-biased hematopoiesis in myelofibrosis and identify mutant clone-specific targets. *bioRxiv*. 2019:642819..
- s8. Notta F, Doulatov S, Laurenti E, Poepl A, Jurisica I, Dick JE. Isolation of single human hematopoietic stem cells capable of long-term multilineage engraftment. *Science*. 2011;333(6039):218-221.
- s9. Calvanese V, Nguyen AT, Bolan TJ, et al. MLLT3 governs human haematopoietic stem-cell self-renewal and engraftment. *Nature*. 2019;576(7786):281-286.
- s10. Boiers C, Carrelha J, Lutteropp M, et al. Lymphomyeloid contribution of an immune-restricted progenitor emerging prior to definitive hematopoietic stem cells. *Cell Stem Cell*. 2013;13(5):535-548.
- s11. Fares I, Chagraoui J, Gareau Y, et al. Pyrimidoindole derivatives are agonists of human hematopoietic stem cell self-renewal. *Science*. 2014;345(6203):1509-1512.
- s12. Corces MR, Buenrostro JD, Wu B, et al. Lineage-specific and single-cell chromatin accessibility charts human hematopoiesis and leukemia evolution. *Nature Genetics*. 2016;48(10):1193-1203.
- s13. Risso D, Ngai J, Speed TP, Dudoit S. Normalization of RNA-seq data using factor analysis of control genes or samples. *Nat Biotechnol*. 2014;32(9):896-902.
- s14. Korotkevich G, Sukhov V, Sergushichev A. Fast gene set enrichment analysis. *bioRxiv*. 2019. doi: 10.1101/060012, <http://biorxiv.org/content/early/2016/06/20/060012>.
- s15. McIntosh BE, Brown ME, Duffin BM, et al. Nonirradiated NOD,B6.SCID II2ry<sup>-/-</sup> kitW41/W41 (NBSGW) mice support multilineage engraftment of human hematopoietic cells. *Stem Cell Reports*. 2015;4(2):171-180.
